# Supplementary material for: Effects of early-life protein starvation on longevity and sexual performance of male medfly
Source: PLoS One. 2019 Jul 25;14(7):e0219518. doi: 10.1371/journal.pone.0219518 (PMC6657835; doi:10.1371/journal.pone.0219518)
Supplement: S1 Dataset File — (XLS) [file pone.0219518.s001.xls]

## Sheet: CALLING_sort_longlived
		age in days
#	TREATMENT	0	1	2	3	4	5	6	7	8	9	10	11	12	13	14	15	16	17	18	19	20	21	22	23	24	25	26	27	28	29	30	31	32	33	34	35	36	37	38	39	40	41	42	43	44	45	46	47
1	PP	0	0	0	0	0	0	8	4	4	0	0	1	13	0	0
2	PP	0	0	0	0	0	0	0	0	0	0	0	0	0	1	4	0	0
3	PP	0	0	0	0	0	0	0	0	0	0	0	0	0	12	13	13	13	3
4	PP	0	0	0	0	0	0	0	0	0	0	0	0	0	13	5	13	0	0	0	0	0
5	PP	0	0	0	0	0	0	0	1	2	0	13	12	11	12	0	0	0	1	0	1	0
6	PP	0	0	0	0	0	0	0	0	0	0	0	9	13	0	13	13	0	0	0	0	0	0	0
7	PP	0	0	0	0	0	0	0	0	0	0	4	1	4	11	4	13	7	11	8	13	11	7	12	2	8
8	PP	0	0	0	0	0	0	0	0	1	2	8	9	10	9	9	4	12	6	11	2	5	5	4	0	0	0
9	PP	0	0	0	0	0	0	0	0	0	0	0	0	0	3	0	0	5	12	10	9	13	13	13	12	12	13	12	0	0	0	0	0	0	0	0	10	13	13	13	12	13	13	12	13	13	13	13	13
10	PP	0	0	0	0	0	0	0	0	0	7	0	0	6	3	1	1	0	0	13	2	8	11	8	6	8	13	13	11	12	13	13	12	13	13	12	0	8	6	6	4	2	2	2	0	6	11	7	2
11	PP	0	0	0	0	0	0	0	0	0	0	0	0	0	1	0	1	0	0	0	0	0	0	0	0	3	0	0	0	0	0	0	0	0	0	0	0	0	0	0	0	0	0	0	0	0	0	0	0
12	PP	0	0	0	0	0	0	0	6	0	0	0	0	13	13	0	6	7	9	0	4	6	8	11	9	6	9	10	13	13	5	13	13	13	11	13	9	3	13	13	13	7	4	5	5	3	13	13	11
13	PP	0	0	0	0	0	0	0	0	0	0	0	1	11	11	13	3	13	12	8	2	9	9	10	13	10	11	12	12	13	13	6	8	13	9	9	12	9	6	1	13	6	13	13	8	13	13	2	2
14	PP	0	0	0	0	0	0	0	0	0	0	0	0	0	0	0	0	0	0	0	0	4	3	3	2	5	8	6	0	10	0	0	0	7	10	13	2	0	13	9	7	8	4	9	13	9	10	13	9
15	PP	0	0	0	0	0	0	0	6	2	0	0	0	13	13	13	13	13	11	13	11	13	13	13	10	6	7	10	13	13	8	12	13	12	12	13	13	10	13	11	12	13	13	13	12	1	0	8	8
16	PP	0	0	0	0	0	0	0	0	0	0	0	9	6	0	12	10	10	10	2	1	10	13	13	7	9	9	12	13	6	13	0	10	8	5	10	0	0	0	8	12	3	0	0	0	1	0	7	11
17	PP	0	0	0	0	0	0	0	0	0	0	0	10	8	1	2	0	0	8	12	0	0	0	5	12	8	12	13	13	12	13	10	13	13	13	10	13	6	13	7	11	3	9	10	0	13	9	13	8
18	PP	0	0	0	0	0	0	0	0	0	0	0	0	6	0	0	0	9	7	2	7	0	8	0	4	5	10	12	7	1	13	9	13	13	6	13	8	11	11	13	6	13	12	13	13	11	12	7	11
19	PP	0	0	0	0	0	0	0	0	0	0	0	0	0	2	10	0	7	0	0	3	0	6	2	11	6	6	7	12	13	12	0	2	3	9	1	6	9	7	1	0	0	12	12	13	13	13	13	11
20	PP	0	0	0	0	0	0	0	0	0	0	0	0	0	0	2	11	3	5	6	2	11	11	13	13	9	11	11	1	0	13	13	8	13	10	0	12	13	13	13	13	13	13	13	13	12	13	13	13
21	PP	0	0	0	0	0	0	0	0	0	0	0	0	0	0	0	1	7	0	0	0	8	9	10	13	7	9	8	2	7	4	0	10	2	0	1	4	12	13	13	13	12	11	13	12	0	8	9	9
22	PP	0	0	0	0	0	0	0	0	0	0	0	0	0	13	0	10	7	13	6	0	9	13	13	5	11	13	13	13	13	6	13	13	10	13	13	10	13	10	11	13	12	13	12	11	10	13	13	11
23	PP	0	0	0	0	0	0	0	0	0	0	0	0	0	0	0	4	11	0	0	0	0	0	6	13	0	0	0	0	4	0	7	0	13	13	0	13	0	0	13	13	11	11	12	7	13	1	12	13
24	PP	0	0	0	0	0	0	0	8	2	0	0	0	10	11	12	12	9	12	13	2	8	13	8	12	9	9	9	12	13	13	13	13	13	13	13	13	10	6	13	13	11	11	13	13	12	1	13	2
25	PP	0	0	0	0	0	3	13	0	2	0	13	9	0	12	13	13	11	0	6	0	6	11	7	13	9	10	11	12	13	13	13	13	13	13	13	8	11	11	13	12	8	13	13	13	13	13	9	13
26	PP	0	0	0	0	0	0	0	0	0	0	0	9	0	0	11	0	2	5	2	0	3	2	4	11	7	9	5	13	9	13	11	13	8	1	0	0	0	10	1	0	5	0	8	13	12	13	13	13
27	PP	0	0	0	0	0	0	0	0	0	0	0	4	10	2	9	10	11	13	11	12	13	8	13	2	9	9	12	12	13	8	0	13	13	12	1	0	6	8	12	11	12	12	12	12	13	13	13	12
28	PP	0	0	0	0	0	0	0	0	0	0	0	0	0	0	0	1	8	0	0	9	10	13	13	13	9	10	12	0	0	0	0	6	0	7	5	0	0	0	3	12	0	0	0	0	0	0	6	11
29	PP	0	0	0	0	0	0	0	0	0	0	0	0	0	0	1	2	1	0	0	1	0	0	2	0	4	1	0	0	0	1	0	2	6	0	0	0	0	0	0	1	0	0	0	7	6	5	11	13
30	PP	0	0	0	0	0	0	0	0	0	0	0	0	0	3	2	4	2	2	0	3	0	4	13	5	4	5	9	13	12	4	0	0	0	0	0	0	0	0	0	9	0	0	0	0	0	0	3	13
31	PP	0	0	0	0	0	0	0	0	0	1	3	0	13	13	13	13	13	9	13	13	13	13	13	13	11	9	12	13	11	13	4	11	8	12	11	8	13	13	13	13	12	12	13	12	11	13	13	13
32	PP	0	0	0	0	0	0	0	0	0	0	0	0	0	0	9	8	0	12	0	0	0	6	4	13	9	11	9	13	3	2	0	8	11	0	5	12	9	8	13	13	0	12	13	13	3	13	13	9
33	PP	0	0	0	0	0	0	0	0	0	0	0	0	0	0	0	3	1	0	0	0	0	4	2	0	4	6	8	8	8	13	7	7	10	12	2	0	0	0	1	13	13	13	12	13	6	13	11	13
34	PP	0	0	0	0	0	0	4	8	9	13	0	13	11	13	13	13	9	13	13	13	11	13	13	13	10	13	13	13	12	13	13	13	11	11	13	13	13	13	13	13	11	12	13	13	13	13	12	13
35	PP	0	0	0	0	0	0	0	0	5	13	10	13	10	10	13	7	12	11	6	6	10	13	12	2	7	3	4	13	12	12	13	13	12	13	13	13	10	13	5	5	10	12	12	13	12	13	13	13
36	PP	0	0	0	0	0	0	0	9	13	13	3	0	8	3	7	8	7	2	6	8	13	13	8	7	7	8	8	3	13	12	12	13	8	7	1	13	13	13	0	13	13	1	5	11	13	12	13	8
37	PP	0	0	0	0	0	0	0	0	0	0	0	0	0	0	0	0	0	0	0	0	0	0	0	0	0	0	0	0	2	0	0	0	0	0	0	0	0	0	0	0	0	0	0	0	0	0	0	0
38	PP	0	0	0	0	0	0	0	1	0	0	0	0	1	0	0	5	9	13	2	0	5	6	0	2	0	3	3	11	6	5	4	3	10	11	8	10	13	11	10	12	10	13	12	13	12	10	13	13
39	PP	0	0	0	0	0	0	0	0	2	1	0	11	9	0	9	4	13	12	12	12	12	7	13	13	10	13	13	8	13	13	6	13	13	13	13	12	13	13	13	13	13	12	13	13	10	13	13	13
40	PP	0	0	0	0	0	0	3	0	0	0	0	0	0	0	3	4	12	13	7	1	0	4	3	5	5	2	3	13	1	12	11	13	3	13	12	13	11	7	9	12	2	11	9	6	5	13	3	13
41	PP	0	0	0	0	0	0	0	0	0	0	0	0	1	2	0	0	1	0	2	0	9	5	1	10	2	5	6	13	5	0	0	12	11	13	5	10	11	9	12	11	12	12	11	13	13	13	13	13
42	PP	0	0	0	0	0	0	0	0	0	0	0	0	0	0	0	4	2	0	0	0	0	0	0	0	0	3	0	3	0	0	0	8	0	8	7	13	0	11	11	2	0	0	0	0	0	0	0	0
43	PP	0	0	0	0	0	0	0	0	0	0	0	0	0	6	0	0	0	0	4	4	12	10	11	12	0	11	12	13	9	4	7	11	0	13	0	0	5	1	0	0	0	2	0	0	1	0	0	2
44	PP	0	0	0	0	0	0	0	0	4	0	7	6	5	12	13	11	5	3	12	13	11	3	8	11	12	13	13	11	11	0	13	0	0	0	13	13	13	0	0	0	10	13	12	0	0	0	0	0
45	PP	0	0	0	0	0	0	0	0	0	0	0	0	0	0	0	0	0	0	2	12	9	10	11	10	7	4	5	12	13	6	1	12	11	6	11	12	8	13	6	8	3	8	8	10	8	13	12	13
46	PP	0	0	0	0	0	0	0	0	10	13	13	7	11	6	11	11	10	11	12	11	12	6	8	3	7	13	13	10	9	12	11	13	13	11	6	12	11	10	13	7	11	10	12	13	13	10	12	13
47	PP	0	0	0	0	0	0	0	0	0	0	0	0	0	0	0	0	0	0	0	0	1	0	0	0	10	9	13	7	13	13	0	7	0	0	0	0	1	0	0	0	0	0	0	0	0	0	0	0
48	PP	0	0	0	0	0	0	0	1	2	4	12	1	0	13	13	12	13	10	12	13	12	11	8	11	11	12	13	12	13	13	13	13	13	13	12	9	12	10	12	12	12	12	13	13	12	13	11	11
49	PP	0	0	1	0	0	0	0	5	12	13	13	11	12	12	12	13	12	13	13	13	13	13	13	11	12	13	12	13	12	12	13	13	13	13	13	13	12	13	12	12	12	13	13	13	13	13	12	12
50	PP	0	0	0	0	9	5	1	3	0	0	0	0	0	1	0	0	0	0	0	1	9	4	7	11	12	13	12	12	12	13	13	11	13	13	12	13	12	7	7	7	7	11	13	13	12	12	13	11
51	PP	0	0	0	0	0	0	0	0	11	0	13	0	0	0	0	0	1	0	0	0	0	1	0	0	0	0	3	0	3	13	12	13	13	13	13	9	13	12	13	0	0	0	0	0	0	3	1	0
52	PP	0	0	0	0	0	0	0	0	0	0	0	0	0	0	0	0	0	0	0	0	0	0	0	0	0	0	0	0	0	0	0	0	0	0	0	0	10	0	0	0	0	0	0	0	0	0	0	0
53	PP	0	0	0	0	0	0	0	0	0	0	0	0	10	9	11	8	0	3	13	11	13	10	13	0	12	10	13	3	13	12	11	13	12	12	12	11	12	10	13	13	10	3	4	6	1	11	11	9
54	PP	0	0	0	0	0	0	0	0	0	0	0	0	6	0	12	13	13	12	5	11	13	4	13	13	13	13	13	13	13	13	13	13	13	13	13	13	10	12	13	13	13	13	13	13	13	13	13	13
55	PP	0	0	0	0	0	0	0	0	0	0	0	0	0	0	6	0	0	0	0	1	0	0	0	0	13	12	13	13	10	13	13	13	13	12	12	12	11	13	0	0	0	13	12	10	13	12	13	13
56	PP	0	0	0	0	0	5	5	7	2	11	7	13	11	0	13	3	0	13	6	13	13	13	10	6	10	12	1	12	13	13	13	12	13	0	10	13	12	13	13	13	13	7	13	12	0	13	13	8
57	PP	0	0	0	0	0	0	0	0	0	6	10	12	8	9	13	13	12	13	12	12	12	13	11	13	13	13	13	13	12	13	12	13	13	13	12	13	12	12	0	0	0	0	0	0	0	0	0	0
58	PP	0	0	0	0	0	0	0	0	0	0	0	0	0	1	0	1	0	0	0	0	0	0	0	0	3	0	0	0	0	0	0	0	0	0	0	0	0	0	0	0	0	0	0	0	0	0	0	0
59	PP	0	0	0	0	0	0	0	0	0	0	0	0	0	0	0	0	0	0	2	0	6	1	5	6	4	13	0	8	0	0	0	0	0	13	0	0	0	0	0	7	0	0	0	0	0	6	0	0
60	PP	0	0	0	0	0	0	0	6	0	0	0	0	13	13	0	6	7	9	0	4	6	8	11	9	6	9	10	13	13	5	13	13	13	11	13	9	3	13	13	13	7	4	5	5	3	13	13	11
61	PP	0	0	0	0	0	0	0	0	0	0	0	0	0	0	0	0	0	0	0	0	0	2	0	5	0	5	7	11	3	1	7	6	2	0	10	7	7	9	6	12	2	0	0	12	4	0	10	9
62	PP	0	0	0	0	0	0	0	0	0	0	13	0	3	2	0	0	0	0	0	0	6	0	9	4	0	12	12	11	7	13	13	11	13	13	11	11	12	0	12	0	13	0	13	13	13	0	0	1
63	PP	0	0	0	0	0	0	0	0	0	0	0	1	0	3	0	0	0	0	6	7	6	0	1	10	7	7	10	7	13	10	12	5	12	10	12	12	13	12	12	10	13	13	13	13	13	13	13	12
64	PP	0	0	0	0	7	8	11	5	11	10	13	13	12	12	12	13	12	12	13	11	13	10	8	11	12	13	13	13	13	13	13	12	13	13	11	13	8	12	12	12	12	11	13	13	13	12	13	12
65	PP	0	0	0	0	0	0	0	0	0	1	6	4	12	13	13	0	0	13	13	10	12	8	10	9	9	12	5	11	6	0	11	0	0	12	0	0	0	0	0	9	13	13	13	10	0	13	13	13
66	PP	0	0	0	0	0	0	0	6	1	0	4	6	0	13	4	13	13	13	13	13	12	0	11	11	9	12	6	13	9	11	0	0	0	0	1	12	0	13	13	13	12	13	12	0	13	13	9	5
67	PP	0	0	0	0	0	0	0	0	0	0	8	4	0	0	0	1	0	0	5	10	11	12	0	12	2	13	6	12	12	9	0	12	9	9	13	7	13	7	5	6	5	9	1	13	13	13	13	13
68	PP	0	0	0	0	0	0	0	5	6	10	7	3	5	6	8	4	0	0	8	0	0	0	4	11	10	12	5	7	13	11	13	13	9	10	9	10	13	5	2	0	5	2	0	0	0	0	5	3
69	PP	0	0	0	0	0	0	0	0	0	0	0	1	11	11	13	3	13	12	8	2	9	9	10	13	10	11	12	12	13	13	6	8	13	9	9	12	9	6	1	13	6	13	13	8	13	13	2	2
70	PP	0	0	0	0	0	0	0	6	1	4	6	0	4	0	0	0	0	0	0	1	0	0	12	13	13	13	11	3	8	11	0	3	0	5	0	12	2	11	0	7	13	13	9	13	2	13	13	9
71	PP	0	0	0	0	0	0	0	0	0	0	0	0	0	0	0	0	0	0	0	0	4	3	3	2	5	8	6	0	10	0	0	0	7	10	13	2	0	13	9	7	8	4	9	13	9	10	13	9
72	PP	0	0	0	0	0	0	5	0	0	0	0	0	0	0	0	10	0	0	0	0	2	13	9	9	0	0	5	0	0	13	0	2	12	0	0	10	10	12	9	2	0	0	2	0	0	0	0	1
73	PP	0	0	0	0	0	0	6	9	0	1	0	7	5	1	0	4	0	0	13	10	1	12	5	1	13	12	13	12	13	11	13	0	1	13	0	12	9	0	13	13	13	12	0	10	13	13	13	13
74	PP	0	0	0	0	0	0	0	0	0	0	3	8	3	13	7	6	12	0	13	0	13	11	13	13	13	13	13	11	13	13	13	13	13	13	13	9	13	13	13	13	13	13	4	13	13	9	13	13
75	PP	0	0	0	0	0	0	0	0	0	0	0	0	5	13	1	0	0	0	0	3	9	11	13	9	9	0	13	1	0	0	0	0	0	0	0	0	0	0	0	7	10	0	13	13	0	13	13	12
76	PP	0	0	0	0	0	0	8	13	12	11	10	10	12	12	13	13	12	11	12	13	13	12	13	13	13	13	13	10	13	8	13	13	13	13	1	13	11	11	11	11	11	10	10	13	13	12	13	3
77	PP	0	0	0	0	5	2	3	0	6	8	4	8	12	6	12	13	0	9	12	8	13	12	11	9	12	11	13	13	13	10	13	13	13	13	12	12	13	10	11	11	11	11	13	13	11	13	13	13
78	PP	0	0	0	6	0	1	0	0	0	3	1	11	10	12	11	10	13	12	11	13	13	13	11	9	13	13	13	13	12	13	13	8	13	6	0	13	11	13	10	11	13	11	13	10	13	10	13	1
79	PP	0	0	0	0	0	0	0	6	2	0	0	0	13	13	13	13	13	11	13	11	13	13	13	10	6	7	10	13	13	8	12	13	12	12	13	13	10	13	11	12	13	13	13	12	1	0	8	8
80	PP	0	0	0	0	0	0	0	0	0	0	0	0	0	12	12	12	13	5	10	11	10	12	11	6	8	12	10	13	12	8	9	12	12	12	13	10	12	0	11	13	10	12	1	0	7	11	11	12
81	PP	0	0	0	0	0	0	0	0	0	0	0	9	6	0	12	10	10	10	2	1	10	13	13	7	9	9	12	13	6	13	0	10	8	5	10	0	0	0	8	12	3	0	0	0	1	0	7	11
82	PP	0	0	0	0	0	0	0	0	0	0	0	10	8	1	2	0	0	8	12	0	0	0	5	12	8	12	13	13	12	13	10	13	13	13	10	13	6	13	7	11	3	9	10	0	13	9	13	8
83	PP	0	0	0	1	0	0	0	0	0	0	0	4	8	13	12	12	13	7	7	9	9	7	6	8	5	7	6	11	9	11	9	13	13	11	10	9	13	12	11	7	13	12	13	10	12	12	12	13
84	PP	0	0	0	0	12	6	11	13	2	13	0	11	10	13	13	12	5	12	13	13	13	13	13	13	13	13	12	13	13	12	7	13	13	12	12	12	12	12	12	12	12	13	12	13	13	13	10	13
85	PP	0	0	0	0	0	13	13	11	13	1	3	0	8	2	0	0	13	11	13	12	1	12	13	13	7	5	11	0	6	13	13	13	1	10	0	12	9	13	13	4	0	13	13	13	13	12	11	5
86	PP	0	0	0	0	0	0	0	0	0	0	0	0	6	0	0	0	9	7	2	7	0	8	0	4	5	10	12	7	1	13	9	13	13	6	13	8	11	11	13	6	13	12	13	13	11	12	7	11
87	PP	0	0	0	0	0	0	0	6	8	0	0	10	0	13	7	0	0	4	0	13	11	13	7	10	12	12	13	13	13	13	0	9	13	9	13	0	10	0	9	0	13	0	13	13	13	0	13	12
88	PP	0	0	0	0	0	0	6	2	9	13	10	10	11	12	12	11	12	12	13	12	13	12	13	10	8	12	9	13	7	12	11	13	13	13	11	11	13	10	12	12	12	12	13	13	13	12	12	12
89	PP	0	0	0	0	0	0	0	0	0	0	0	0	0	2	10	0	7	0	0	3	0	6	2	11	6	6	7	12	13	12	0	2	3	9	1	6	9	7	1	0	0	12	12	13	13	13	13	11
90	PP	0	0	0	0	0	0	0	0	0	0	0	0	0	0	2	11	3	5	6	2	11	11	13	13	9	11	11	1	0	13	13	8	13	10	0	12	13	13	13	13	13	13	13	13	12	13	13	13
91	PP	0	0	0	0	0	0	0	9	7	11	13	0	4	12	9	2	9	11	7	11	6	8	2	12	1	5	7	4	10	13	6	12	13	10	11	0	13	12	12	3	13	13	5	12	12	13	12	8
92	PP	0	0	0	0	0	2	5	11	2	5	9	9	12	11	12	11	13	12	13	11	11	13	13	11	6	11	13	13	13	13	13	13	13	13	12	11	13	11	10	10	8	10	1	7	12	13	8	13
93	PP	0	0	0	0	0	0	0	0	0	0	0	12	0	13	4	13	0	13	13	13	11	12	12	11	10	1	13	12	13	13	7	0	13	0	12	0	0	0	13	13	9	13	13	13	13	12	11	8
94	PP	0	0	0	0	0	0	0	5	0	0	0	0	7	0	0	0	0	0	0	0	0	0	4	4	0	0	0	0	0	0	0	0	1	8	11	0	8	0	9	0	13	0	0	0	0	0	2	3
95	PP	0	0	0	0	0	0	0	0	0	0	0	0	0	0	12	0	0	0	0	2	13	10	12	12	12	7	0	0	0	0	12	13	13	13	0	13	9	12	8	13	0	0	0	13	13	13	13	13
96	PP	0	0	0	0	0	0	0	0	0	2	11	13	13	11	13	12	13	12	13	12	12	8	12	12	12	13	13	13	13	10	13	13	10	13	12	11	12	13	13	13	13	13	11	12	6	13	12	13
97	PP	0	0	0	0	7	1	0	1	0	0	0	0	0	0	0	0	0	11	13	11	1	9	12	10	0	12	12	13	13	13	13	13	13	12	8	12	13	13	13	13	3	13	3	13	0	13	11	13
98	PP	0	0	0	0	5	0	7	5	7	13	6	13	10	8	12	11	13	12	13	13	13	12	13	12	12	12	13	13	12	12	13	13	4	6	12	9	7	7	7	7	10	12	13	12	9	13	9	13
99	PP	0	0	0	0	0	0	0	0	0	0	0	0	0	0	0	0	0	0	0	1	0	0	0	0	12	10	0	0	0	0	0	0	0	0	13	0	0	0	0	0	0	0	0	0	0	0	0	0
100	PP	0	0	0	0	0	0	0	0	0	0	0	1	0	0	0	0	0	0	0	0	0	0	0	0	3	0	1	2	3	10	0	6	12	12	0	4	10	13	10	5	0	0	11	7	7	12	0	0
101	PP	0	0	0	0	0	10	0	0	5	13	12	6	8	13	0	6	4	0	13	12	13	12	9	11	12	11	13	11	12	11	13	9	13	13	12	0	0	0	0	0	13	0	12	13	13	13	9	11
102	PP	0	0	0	0	11	9	0	0	12	10	0	9	12	11	12	12	11	0	0	13	4	13	13	11	13	11	12	13	13	12	13	13	12	13	13	10	12	13	10	11	11	10	9	11	12	13	13	9
103	PP	0	0	0	0	0	0	0	0	0	0	0	0	0	0	0	1	7	0	0	0	8	9	10	13	7	9	8	2	7	4	0	10	2	0	1	4	12	13	13	13	12	11	13	12	0	8	9	9
104	PP	0	0	0	0	0	0	0	0	0	0	0	0	0	3	1	2	2	7	0	9	5	0	7	9	3	5	11	8	0	6	0	12	12	7	9	9	9	0	0	11	1	3	0	13	5	12	0	9
105	PP	0	0	0	0	0	0	10	12	12	2	3	5	13	9	1	11	9	13	11	6	8	0	13	8	0	9	0	10	7	10	0	0	0	0	0	0	0	8	0	0	0	0	0	0	0	0	0	1
106	PP	0	0	0	0	0	0	0	0	0	0	0	0	0	13	0	10	7	13	6	0	9	13	13	5	11	13	13	13	13	6	13	13	10	13	13	10	13	10	11	13	12	13	12	11	10	13	13	11
107	PP	0	0	0	0	0	0	0	0	13	5	4	1	0	0	0	0	12	13	13	13	13	13	12	13	13	10	13	12	13	13	13	13	13	8	13	13	5	13	13	13	13	13	2	0	4	13	13	13
108	PP	0	0	0	0	0	0	0	0	0	0	1	0	0	13	5	4	11	3	0	12	9	0	7	10	11	2	11	10	12	0	12	13	13	5	12	1	8	13	13	13	12	13	12	0	13	0	6	10
109	PP	0	0	0	0	0	0	0	0	0	0	0	0	0	2	0	0	0	0	13	0	0	0	7	13	6	13	13	13	8	10	13	13	8	11	13	13	0	13	6	13	0	13	13	0	13	12	10	13
110	PP	0	0	0	0	0	4	0	1	0	1	0	0	0	7	2	13	4	13	0	0	0	13	13	13	1	0	13	0	0	13	1	0	0	0	0	0	0	0	7	7	0	13	13	13	0	0	13	13
111	PP	0	0	0	0	0	0	0	0	0	4	0	5	0	0	0	0	0	0	12	0	11	5	5	6	12	0	13	10	0	0	0	0	13	13	13	0	0	13	0	6	13	13	0	0	0	12	13	13
112	PP	0	0	0	0	0	9	6	5	13	4	9	9	10	11	10	13	13	13	8	13	7	13	11	12	12	13	12	13	13	13	13	13	13	13	12	13	12	13	13	13	13	11	13	13	13	13	13	13
113	PP	0	0	0	0	0	0	0	0	0	0	0	0	0	0	0	4	11	0	0	0	0	0	6	13	0	0	0	0	4	0	7	0	13	13	0	13	0	0	13	13	11	11	12	7	13	1	12	13
114	PP	0	0	0	0	0	0	0	0	12	11	8	12	13	12	4	12	12	11	13	13	13	13	12	13	13	13	13	13	13	13	13	13	12	12	12	13	9	12	11	13	13	12	13	13	12	13	13	13
115	PP	0	0	0	0	0	0	0	8	2	0	0	0	10	11	12	12	9	12	13	2	8	13	8	12	9	9	9	12	13	13	13	13	13	13	13	13	10	6	13	13	11	11	13	13	12	1	13	2
116	PP	0	0	0	0	0	3	13	0	2	0	13	9	0	12	13	13	11	0	6	0	6	11	7	13	9	10	11	12	13	13	13	13	13	13	13	8	11	11	13	12	8	13	13	13	13	13	9	13
117	PP	0	0	0	0	5	7	12	10	2	12	13	13	13	13	13	13	12	13	13	13	13	13	11	11	13	13	13	13	13	13	13	13	13	13	12	13	12	11	11	11	11	12	13	13	13	10	13	5
118	PP	0	0	0	0	8	1	1	13	13	12	12	12	5	10	6	13	12	3	13	8	12	11	1	8	13	10	10	12	11	12	13	13	13	13	13	13	13	12	13	11	13	13	13	13	13	12	13	13
119	PP	0	0	0	0	0	0	0	0	0	0	0	11	9	11	2	2	0	12	13	7	11	7	1	0	0	13	12	13	11	13	12	11	5	11	13	13	11	8	0	6	13	13	12	13	12	13	6	11
120	PP	0	0	0	0	0	0	0	0	0	0	0	9	0	0	11	0	2	5	2	0	3	2	4	11	7	9	5	13	9	13	11	13	8	1	0	0	0	10	1	0	5	0	8	13	12	13	13	13
121	PP	0	0	0	0	0	0	0	0	0	0	0	0	0	0	0	0	0	0	0	0	0	0	0	0	2	5	0	8	13	1	0	1	6	7	0	6	0	0	0	0	4	0	11	9	7	13	13	12
122	PP	0	0	0	0	0	0	0	0	0	0	0	4	10	2	9	10	11	13	11	12	13	8	13	2	9	9	12	12	13	8	0	13	13	12	1	0	6	8	12	11	12	12	12	12	13	13	13	12
123	PP	0	0	0	0	0	0	0	0	0	0	0	0	0	0	0	1	8	0	0	9	10	13	13	13	9	10	12	0	0	0	0	6	0	7	5	0	0	0	3	12	0	0	0	0	0	0	6	11
124	PP	0	0	0	0	0	0	0	0	0	0	0	0	0	0	1	2	1	0	0	1	0	0	2	0	4	1	0	0	0	1	0	2	6	0	0	0	0	0	0	1	0	0	0	7	6	5	11	13
125	PP	0	0	0	0	0	0	0	0	0	0	0	0	0	3	2	4	2	2	0	3	0	4	13	5	4	5	9	13	12	4	0	0	0	0	0	0	0	0	0	9	0	0	0	0	0	0	3	13
126	PP	0	0	0	0	0	0	0	0	0	1	3	0	13	13	13	13	13	9	13	13	13	13	13	13	11	9	12	13	11	13	4	11	8	12	11	8	13	13	13	13	12	12	13	12	11	13	13	13
127	PP	0	0	0	0	0	0	0	0	0	0	0	0	0	0	9	8	0	12	0	0	0	6	4	13	9	11	9	13	3	2	0	8	11	0	5	12	9	8	13	13	0	12	13	13	3	13	13	9
128	PP	0	0	0	0	0	0	0	0	0	0	2	4	12	7	13	13	10	13	13	13	13	13	6	12	13	12	12	12	13	13	12	12	10	12	13	13	11	12	13	13	13	13	13	13	12	12	13	13
129	PP	0	0	0	0	0	0	0	0	0	8	2	5	12	6	0	13	13	13	8	13	11	13	13	12	13	13	12	12	13	12	9	12	13	13	12	13	12	13	5	13	13	12	13	13	13	12	11	13
130	PP	0	0	0	0	0	0	0	0	0	0	0	0	0	0	0	3	1	0	0	0	0	4	2	0	4	6	8	8	8	13	7	7	10	12	2	0	0	0	1	13	13	13	12	13	6	13	11	13
131	PP	0	0	0	0	0	0	4	8	9	13	0	13	11	13	13	13	9	13	13	13	11	13	13	13	10	13	13	13	12	13	13	13	11	11	13	13	13	13	13	13	11	12	13	13	13	13	12	13
132	PP	0	0	0	0	0	0	0	0	5	13	10	13	10	10	13	7	12	11	6	6	10	13	12	2	7	3	4	13	12	12	13	13	12	13	13	13	10	13	5	5	10	12	12	13	12	13	13	13
133	PP	0	0	0	0	0	0	0	9	13	13	3	0	8	3	7	8	7	2	6	8	13	13	8	7	7	8	8	3	13	12	12	13	8	7	1	13	13	13	0	13	13	1	5	11	13	12	13	8
134	PP	0	0	0	0	0	0	0	0	0	0	0	0	0	0	0	0	0	0	0	0	0	0	0	0	0	0	0	0	2	0	0	0	0	0	0	0	0	0	0	0	0	0	0	0	0	0	0	0
135	PP	0	0	0	0	0	0	0	1	0	0	0	0	1	0	0	5	9	13	2	0	5	6	0	2	0	3	3	11	6	5	4	3	10	11	8	10	13	11	10	12	10	13	12	13	12	10	13	13
136	PP	0	0	0	0	0	0	0	0	2	1	0	11	9	0	9	4	13	12	12	12	12	7	13	13	10	13	13	8	13	13	6	13	13	13	13	12	13	13	13	13	13	12	13	13	10	13	13	13
137	PP	0	0	0	0	0	0	3	0	0	0	0	0	0	0	3	4	12	13	7	1	0	4	3	5	5	2	3	13	1	12	11	13	3	13	12	13	11	7	9	12	2	11	9	6	5	13	3	13
138	PP	0	0	0	0	0	0	0	0	6	11	12	8	8	4	5	8	11	12	12	8	13	12	11	8	3	5	6	12	5	5	12	12	9	6	7	4	13	12	12	9	9	6	3	13	13	12	13	10
139	PP	0	0	0	0	0	6	1	10	11	6	11	11	10	12	7	5	5	13	10	13	3	13	6	5	13	4	8	8	6	9	8	8	12	6	13	8	13	13	7	5	7	9	9	11	7	0	13	7
140	PP	0	0	0	0	0	0	0	0	0	0	0	4	0	0	2	5	1	0	6	9	8	3	8	7	8	12	10	6	8	13	6	11	7	12	11	12	13	10	8	13	13	9	3	11	10	12	13	13
141	PP	0	0	0	0	0	0	0	0	0	0	0	0	1	2	0	0	1	0	2	0	9	5	1	10	2	5	6	13	5	0	0	12	11	13	5	10	11	9	12	11	12	12	11	13	13	13	13	13
1	PS	0	0	0	0	0	0	0	0	0	0	0	0	6	12	0
2	PS	0	0	0	0	0	0	6	13	10	8	11	8	11	0	0	0	0
3	PS	0	0	0	0	0	0	0	0	0	0	0	0	0	3	1	10	0
4	PS	0	0	0	0	0	0	0	0	0	0	12	10	0	0	0	0	0	0	1	0
5	PS	0	0	0	0	0	0	0	2	0	0	8	6	0	0	12	10	7	6	0	0	0
6	PS	0	0	0	0	0	0	4	8	7	9	11	10	0	0	9	13	5	0	13	0	0	0	0	0	0
7	PS	0	0	0	0	0	0	0	0	0	0	0	7	0	2	13	10	0	0	4	13	9	13	3	9	0	0
8	PS	0	0	0	0	0	0	0	0	0	0	1	0	0	0	0	0	0	0	0	0	0	3	0	0	8	7	4	0
9	PS	0	0	0	0	0	0	0	0	0	0	0	0	6	8	13	12	6	13	4	13	8	11	8	10	7	10	6	0	0
10	PS	0	0	0	0	0	0	0	0	0	0	10	6	1	3	11	9	11	11	10	13	0	0	13	13	0	3	0	0	0	2	0	0	0
11	PS	0	0	0	0	0	0	0	0	0	0	0	0	0	0	1	0	0	0	1	1	0	1	0	0	0	0	0	12	0	0	12	7	0	0	0
12	PS	0	0	0	0	0	0	0	0	0	0	0	0	10	9	9	2	0	0	0	0	2	3	3	1	0	0	8	2	4	7	7	8	11	4	3	0
13	PS	0	0	0	0	0	0	5	3	1	0	0	0	10	6	0	0	0	8	9	12	7	8	13	4	3	0	0	12	0	0	0	0	0	0	1	0	0
14	PS	0	0	0	0	0	0	0	0	2	4	3	3	5	6	5	13	6	0	13	9	0	0	0	7	7	6	6	9	8	12	3	8	7	0	6	0	0	0
15	PS	0	0	0	0	0	0	0	0	0	0	0	0	2	10	6	12	4	0	0	0	4	1	0	0	0	2	2	0	0	0	0	0	0	0	0	0	0	0	0
16	PS	0	0	0	0	0	0	0	0	0	0	0	0	0	0	2	2	11	0	12	1	0	4	1	2	6	9	5	0	13	13	13	12	0	2	0	0	9	0	0	0	0
17	PS	0	0	0	0	0	0	0	1	0	0	10	11	12	12	13	13	12	9	10	11	0	4	5	2	5	2	2	0	0	0	1	0	0	1	0	0	0	0	0	0	0	1	0	0
18	PS	0	0	0	0	0	0	0	1	4	6	6	3	0	7	7	11	7	6	8	9	9	2	0	0	9	5	3	0	5	4	8	12	5	10	0	7	6	0	8	3	0	4	0	9	3	6	0	0
19	PS	0	0	0	0	0	0	0	0	0	0	0	0	0	2	3	8	12	0	0	0	0	2	0	10	0	0	0	0	0	0	0	0	0	0	0	0	0	1	0	13	13	7	7	0	3	6	11	2
20	PS	0	0	0	0	0	0	0	0	0	0	0	0	0	1	0	3	1	0	0	0	0	2	13	9	4	3	3	1	0	1	0	0	0	0	0	0	0	0	0	0	0	0	0	0	0	0	0	0
21	PS	0	0	0	0	0	0	0	0	0	0	0	0	0	6	11	6	0	0	0	0	0	0	9	1	2	2	2	0	0	13	12	12	13	13	13	13	13	2	13	0	0	0	2	0	5	2	1	13
22	PS	0	0	0	0	0	0	0	0	3	11	0	0	5	7	8	8	0	0	10	12	7	9	6	0	2	0	0	13	13	10	13	6	9	11	0	13	7	0	12	9	0	13	13	13	1	13	0	0
23	PS	0	0	0	0	0	0	0	0	0	0	0	0	1	0	0	7	0	0	0	10	10	10	0	0	7	2	1	7	5	9	0	0	0	0	9	0	7	13	13	0	0	8	0	9	0	0	0	0
24	PS	0	0	0	0	0	0	0	3	0	0	0	0	0	4	1	0	0	0	0	0	0	0	6	11	6	2	2	0	13	11	0	12	13	9	0	1	9	13	5	0	13	9	8	5	3	12	0	8
25	PS	0	0	0	0	0	0	0	0	0	0	1	0	0	0	0	7	0	0	0	2	6	8	5	0	4	5	8	13	0	0	0	0	0	0	0	2	0	0	0	0	0	0	0	0	2	0	0	0
26	PS	0	0	0	0	0	0	0	0	0	0	0	0	13	10	13	13	4	10	13	13	13	13	5	0	0	0	0	0	0	7	0	13	0	0	0	0	0	0	0	0	0	0	0	0	0	0	1	0
27	PS	0	0	0	0	0	0	0	4	9	13	12	12	12	9	5	2	0	0	0	0	1	0	0	0	0	0	0	0	0	0	0	0	0	0	0	0	0	0	0	0	0	0	0	10	0	0	1	0
28	PS	0	0	0	0	0	0	0	0	0	0	0	0	9	9	3	13	5	1	0	0	0	1	4	0	0	0	0	0	0	0	0	0	0	0	0	0	0	0	0	0	0	0	0	0	0	0	2	0
29	PS	0	0	0	0	0	0	0	0	0	0	0	0	0	0	0	6	0	0	0	0	3	4	0	0	3	0	1	13	13	0	0	0	0	0	0	0	0	0	6	13	0	0	5	0	10	8	7	0
30	PS	0	0	0	0	0	0	0	0	0	0	0	0	0	0	0	0	0	0	0	0	0	0	0	7	0	1	1	2	7	10	9	13	10	0	9	0	10	3	0	0	0	0	0	0	8	13	8	0
31	PS	0	0	0	0	0	0	0	0	0	0	0	0	0	0	0	1	0	0	0	10	7	8	6	13	10	2	2	0	0	0	0	0	12	0	0	0	0	1	3	0	0	0	0	0	11	2	9	1
32	PS	0	0	0	0	0	0	0	0	0	0	1	0	0	0	13	13	1	0	0	0	0	2	0	0	3	0	0	5	0	0	0	0	0	0	9	10	10	12	3	10	13	2	5	0	0	0	7	0
33	PS	0	0	0	0	0	0	0	0	0	0	0	0	0	0	0	0	0	0	0	0	0	2	0	0	0	0	0	0	0	0	0	2	0	0	0	0	0	0	0	0	0	4	0	10	0	0	0	0
34	PS	0	0	0	0	0	0	0	0	0	0	0	0	13	10	7	4	4	1	8	0	5	0	13	0	5	1	0	0	0	0	0	0	0	0	0	0	0	0	0	0	0	0	0	0	0	0	0	0
35	PS	0	0	0	0	0	0	0	0	0	0	7	10	0	6	10	9	0	10	10	8	0	2	6	1	4	3	3	0	0	0	0	0	10	4	2	11	13	2	7	9	8	7	7	0	0	10	8	13
36	PS	0	0	0	0	0	3	5	6	3	0	0	0	1	10	13	13	11	9	0	0	4	3	13	0	0	0	0	13	13	11	11	3	0	0	0	0	0	9	0	0	0	1	0	8	1	12	4	0
37	PS	0	0	0	0	0	0	0	0	0	0	0	0	0	0	0	0	0	0	0	1	0	2	0	7	3	2	1	0	0	0	0	0	1	13	4	2	8	0	4	0	0	0	1	0	2	2	0	0
38	PS	0	0	0	0	0	0	0	0	0	0	0	0	0	9	0	0	0	0	0	0	8	8	3	10	3	3	6	0	13	11	10	9	11	0	0	0	13	7	3	13	0	0	3	3	4	0	0	0
39	PS	0	0	0	0	0	0	0	0	0	0	0	0	0	0	5	6	0	1	13	13	12	13	13	13	10	10	11	11	13	13	13	12	0	0	0	10	13	9	13	9	11	10	11	13	7	13	13	3
40	PS	0	0	0	0	0	0	0	4	4	8	6	0	0	0	0	1	0	0	2	0	0	2	7	0	7	0	0	0	0	0	0	0	0	0	0	0	0	0	7	0	0	0	0	0	0	3	0	0
41	PS	0	0	0	0	0	0	0	0	0	1	0	0	4	0	0	2	0	0	0	0	4	0	0	10	5	8	9	12	3	12	13	5	13	13	13	13	13	9	7	0	8	13	11	9	7	13	13	13
42	PS	0	0	0	0	0	0	0	0	0	0	0	0	0	0	0	0	0	0	0	0	0	0	0	0	8	4	0	0	0	0	0	0	0	0	0	0	0	0	0	0	0	0	0	0	0	0	0	0
1	SS	0	0	0	0	0	0	0	0	0	0	0	0	4	0	0
2	SS	0	0	0	0	0	0	0	0	0	0	0	0	0	0	0	0
3	SS	0	0	0	0	0	0	0	0	0	0	0	0	0	0	0	0
4	SS	0	0	0	0	0	0	0	5	7	6	10	3	0	0	0	0	0	0
5	SS	0	0	0	0	0	0	0	0	0	0	0	0	0	0	0	0	0	0	0
6	SS	0	0	0	0	0	0	0	0	0	0	0	0	0	0	3	0	0	3	0	0
7	SS	0	0	0	0	0	0	0	0	0	0	0	0	0	0	0	4	0	0	0	0	0
8	SS	0	0	0	0	0	0	0	8	0	0	0	0	2	0	0	7	2	4	0	0	0
9	SS	0	0	0	0	0	0	0	0	0	0	0	0	0	0	0	0	0	0	0	0	0
10	SS	0	0	0	0	0	0	3	0	0	5	2	2	0	7	0	7	5	4	4	7	0	4
11	SS	0	0	0	0	0	0	0	0	0	0	0	0	0	0	0	2	0	0	0	0	0	0	0
12	SS	0	0	0	0	0	0	0	0	0	0	0	0	0	0	0	0	0	0	0	0	0	0	0	1
13	SS	0	0	0	0	0	0	0	0	0	0	6	4	0	0	9	0	0	9	0	12	0	9	3	0
14	SS	0	0	0	0	0	0	0	0	0	0	0	0	0	0	0	0	0	13	1	0	5	6	9	4	0
15	SS	0	0	0	0	0	0	0	0	0	0	0	0	0	0	0	0	0	0	0	0	0	0	0	0	2
16	SS	0	0	0	0	0	0	0	0	0	0	6	0	0	0	0	13	0	6	0	0	0	0	2	0	0	0
17	SS	0	0	0	0	0	0	0	0	0	0	0	0	0	0	0	0	7	13	6	9	0	8	2	0	2	1	1
18	SS	0	0	0	0	0	0	0	0	0	0	0	0	0	5	0	6	0	0	0	13	0	0	0	0	0	0	0
19	SS	0	0	0	0	0	0	0	5	10	13	0	0	0	0	0	10	0	0	0	0	0	0	0	0	0	0	0
20	SS	0	0	0	0	0	0	0	0	0	0	0	0	0	0	0	0	0	9	0	0	0	0	0	0	0	0	0	0
21	SS	0	0	0	0	0	0	0	0	0	0	0	0	0	0	0	0	0	0	0	0	3	0	0	0	0	0	0	0	0	0	0
22	SS	0	0	0	0	0	0	0	0	0	0	0	0	0	0	0	0	0	2	13	10	10	2	13	13	7	10	12	8	13	13	13	0
23	SS	0	0	0	0	0	0	0	0	0	0	0	0	0	0	0	0	0	0	0	0	0	0	0	0	0	0	0	0	0	0	0	0
24	SS	0	0	0	0	0	0	0	0	0	0	0	0	0	9	0	5	0	0	0	0	0	3	0	0	0	0	0	7	0	8	0	0	0	0	0	0	0	0
25	SS	0	0	0	0	0	0	0	0	0	0	0	0	13	7	13	0	0	2	6	13	13	13	11	5	7	0	0	0	0	0	0	0	0	0	0	0	3	0	0	0	0	0	0
26	SS	0	0	0	0	0	0	0	0	0	0	0	0	0	0	0	0	12	0	0	0	0	2	6	9	9	8	4	13	12	10	8	13	13	10	2	0	13	0	0	0	0	0	0	0	0	0
27	SS	0	0	0	0	0	0	0	0	0	1	0	0	0	0	0	0	0	0	0	0	0	2	1	0	2	0	0	0	0	11	1	0	0	0	0	0	0	0	0	0	0	0	0	0	0	0	0
28	SS	0	0	0	0	0	0	0	0	0	0	0	0	0	0	0	0	0	0	0	0	3	5	7	2	5	5	3	1	0	0	0	0	0	0	0	4	0	0	3	0	0	0	0	0	0	0	0	0
29	SS	0	0	0	0	0	0	0	0	0	0	0	0	0	0	0	0	1	0	0	0	0	0	0	1	0	0	0	7	2	7	4	0	0	0	0	4	0	0	0	0	0	0	0	0	0	0	0	0
30	SS	0	0	0	0	0	0	0	0	0	0	0	0	0	0	0	0	0	9	0	0	0	0	2	0	2	2	0	0	1	0	0	0	0	0	0	0	3	6	8	11	8	7	11	10	10	5	13	0
31	SS	0	0	0	0	0	0	0	0	0	0	0	0	0	0	0	0	11	0	0	0	8	3	0	0	0	0	0	0	0	0	0	0	0	0	0	0	0	0	0	0	0	0	0	0	0	0	0	0
32	SS	0	0	0	0	0	0	4	0	0	0	0	0	0	0	0	0	0	0	0	13	13	13	13	0	3	5	3	11	4	0	0	0	0	0	0	0	0	1	5	0	2	0	0	0	0	6	0	0
33	SS	0	0	0	0	0	0	6	13	0	0	0	0	0	0	0	0	11	5	12	13	13	10	11	0	4	5	5	0	0	4	0	0	0	0	0	5	0	0	0	0	0	5	0	0	0	2	7	0
34	SS	0	0	0	0	0	0	0	0	0	0	0	0	0	0	0	0	0	0	0	0	4	0	10	13	12	13	12	0	0	0	0	0	0	0	0	0	0	0	4	1	0	0	0	0	2	9	0	9
35	SS	0	0	0	0	0	0	0	0	0	0	0	0	0	0	13	13	0	0	0	0	1	4	0	0	0	0	0	0	0	0	0	0	0	0	0	0	0	7	0	0	0	1	0	0	0	0	0	0
36	SS	0	0	0	0	0	0	0	0	0	0	3	0	0	0	8	0	0	9	8	4	8	7	8	13	7	9	9	12	10	12	10	13	0	0	2	6	6	13	13	1	10	1	9	6	5	0	13	0
37	SS	0	0	0	0	0	0	0	0	0	0	0	0	0	0	0	0	0	0	0	0	0	0	0	0	0	0	0	13	0	0	0	0	0	0	0	0	0	0	0	0	0	0	0	0	0	0	8	0
38	SS	0	0	0	0	0	0	0	0	0	0	0	0	0	0	0	0	0	0	0	0	0	4	13	0	0	0	0	0	0	0	0	0	0	0	0	0	0	6	0	0	0	0	0	0	0	0	0	0
39	SS	0	0	0	0	0	0	0	0	0	0	0	0	0	0	0	0	0	0	0	0	0	2	0	0	0	0	0	0	0	0	0	0	0	0	0	0	0	0	0	0	0	0	0	0	0	0	0	0
40	SS	0	0	0	0	0	0	0	0	0	0	0	0	0	0	0	0	0	0	0	0	0	0	0	0	0	0	0	0	0	0	0	0	0	0	0	0	0	0	0	0	0	0	0	0	0	0	0	0
41	SS	0	0	0	0	0	0	0	0	0	0	0	0	0	0	0	1	4	0	4	4	4	4	2	0	3	3	5	0	0	0	0	0	0	0	0	0	0	0	2	8	0	1	0	7	3	0	0	2
42	SS	0	0	0	0	0	0	0	0	0	0	0	0	0	0	0	0	0	0	0	0	0	3	1	0	6	4	4	0	1	0	3	0	0	0	0	0	0	0	1	0	0	0	0	4	0	0	6	0
43	SS	0	0	0	0	0	0	0	0	0	0	4	0	2	0	0	0	0	4	2	0	2	5	6	0	7	6	3	5	0	0	0	2	0	0	0	0	0	0	0	0	0	0	0	0	0	0	0	0
44	SS	0	0	0	0	0	0	0	0	0	0	0	0	0	0	0	0	0	2	4	0	0	2	1	0	0	0	0	0	0	0	0	0	1	0	0	0	0	0	0	0	0	0	0	0	0	0	9	0
45	SS	0	0	0	0	0	0	0	0	0	0	0	0	0	0	0	0	0	2	0	0	0	0	0	0	8	4	2	3	0	13	5	0	2	2	10	0	0	13	0	13	0	0	0	9	3	0	0	0
46	SS	0	0	0	0	0	0	0	0	0	0	13	13	4	3	5	0	0	0	8	0	2	4	0	13	6	3	1	0	10	12	0	0	0	9	0	9	9	4	13	6	0	0	0	0	0	0	12	6
47	SS	0	0	0	0	0	0	0	0	0	0	0	0	0	0	0	13	10	11	12	10	0	3	3	12	0	4	5	0	0	0	6	11	0	3	0	12	0	13	0	0	0	0	6	0	0	12	7	0
48	SS	0	0	0	0	0	0	0	0	0	0	0	0	0	0	0	0	0	0	0	2	11	11	10	0	13	0	0	4	12	0	13	12	0	0	0
49	SS	0	0	0	0	0	0	0	1	0	0	0	0	1	0	0	0	0	0	13	7	0	0	9	9	0	0	5	0	13	11	3	3	13	0	0	0
50	SS	0	0	0	0	0	0	0	0	0	6	5	6	12	10	5	0	10	0	4	0	11	13	11	0	11	0	1	7	13	12	9	2	4	12	13	5	12
51	SS	0	0	0	0	0	0	0	0	0	0	0	0	0	9	0	5	0	0	0	0	0	3	0	0	0	0	0	7	0	8	0	0	0	0	0	0	0	0
52	SS	0	0	0	0	0	0	0	0	0	0	0	0	0	0	0	0	6	0	0	0	0	0	1	0	7	7	3	7	1	6	0	0	0	0	0	0	0	0
53	SS	0	0	0	0	0	0	0	0	0	0	0	0	0	0	0	0	0	0	0	0	0	3	3	2	0	7	0	5	0	0	0	0	0	0	0	0	0	0
54	SS	0	0	0	0	7	11	5	12	11	13	11	13	11	6	10	12	13	0	13	13	13	11	8	13	13	12	13	10	13	6	13	13	0	0	0	0	0	0	0
55	SS	0	0	0	0	0	0	0	0	0	4	0	0	0	0	12	0	9	0	13	0	12	13	13	13	6	1	13	13	13	0	6	13	13	0	0	0	0	0	0
56	SS	0	0	0	0	0	0	0	0	0	12	7	10	0	13	0	12	12	13	12	12	13	13	4	3	3	0	0	4	0	4	0	2	4	0	0	11	0	0	0	0
57	SS	0	0	0	0	0	0	12	0	1	12	13	11	12	12	13	0	0	7	10	11	10	10	12	9	0	11	13	0	0	0	0	3	12	13	12	5	13	9	12	7	7
58	SS	0	0	0	0	0	0	6	0	9	0	1	13	5	13	0	13	0	0	0	12	8	9	11	4	3	0	3	1	4	0	0	0	0	13	4	13	0	13	0	0	0	0
59	SS	0	0	0	0	0	0	0	0	0	0	0	0	13	7	13	0	0	2	6	13	13	13	11	5	7	0	0	0	0	0	0	0	0	0	0	0	3	0	0	0	0	0	0
60	SS	0	0	0	0	0	0	0	3	0	0	0	2	9	0	4	0	11	0	0	0	0	0	10	12	13	11	9	0	1	0	0	10	0	13	0	0	0	0	0	0	0	0	0
61	SS	0	0	0	0	1	0	0	0	0	1	0	2	2	0	0	0	13	4	4	6	0	4	9	9	0	8	0	3	6	0	0	5	0	0	0	0	1	0	0	0	0	0	0	0
62	SS	0	0	0	0	0	0	0	0	0	0	1	0	0	0	0	0	0	0	8	13	8	0	5	4	0	0	0	0	13	0	0	0	0	0	0	12	0	0	0	0	1	0	0	0
63	SS	0	0	0	0	0	0	0	0	0	0	0	0	0	0	0	0	2	0	6	0	0	0	0	0	0	6	0	0	0	1	9	9	0	1	0	0	2	0	7	0	8	0	0	0
64	SS	0	0	0	0	0	0	0	0	0	0	0	0	4	1	7	12	0	3	2	11	13	10	9	2	7	7	4	12	0	12	10	11	4	12	1	12	1	0	0	0	1	1	3	0	0
65	SS	0	0	0	0	0	0	0	0	0	0	0	0	0	0	0	0	12	0	0	0	0	2	6	9	9	8	4	13	12	10	8	13	13	10	2	0	13	0	0	0	0	0	0	0	0	0
66	SS	0	0	0	0	4	0	0	0	2	2	4	8	4	0	6	2	0	0	2	0	0	0	3	10	13	4	2	0	0	2	0	12	12	0	10	9	0	0	0	4	7	13	13	0	8	0
67	SS	0	0	0	0	0	0	0	0	0	1	0	0	0	0	0	0	0	0	0	0	0	2	1	0	2	0	0	0	0	11	1	0	0	0	0	0	0	0	0	0	0	0	0	0	0	0	0
68	SS	0	0	0	0	0	1	6	9	8	5	9	12	13	12	13	13	12	8	7	0	6	6	3	12	1	13	0	1	12	0	0	0	0	7	7	11	0	0	0	0	0	0	7	2	0	0	0
69	SS	0	0	0	0	0	0	0	0	0	0	0	0	0	0	0	0	0	0	0	0	3	5	7	2	5	5	3	1	0	0	0	0	0	0	0	4	0	0	3	0	0	0	0	0	0	0	0	0
70	SS	0	0	0	0	0	0	0	0	0	0	0	0	0	0	0	0	1	0	0	0	0	0	0	1	0	0	0	7	2	7	4	0	0	0	0	4	0	0	0	0	0	0	0	0	0	0	0	0
71	SS	0	0	0	0	0	0	0	0	0	0	0	0	0	0	0	0	0	0	0	0	0	0	8	11	13	4	0	0	12	0	8	0	0	0	0	1	0	0	0	0	0	0	0	10	0	6	0	12
72	SS	0	0	0	0	0	0	0	0	0	0	0	0	0	0	0	0	0	9	0	0	0	0	2	0	2	2	0	0	1	0	0	0	0	0	0	0	3	6	8	11	8	7	11	10	10	5	13	0
73	SS	0	0	0	0	0	1	0	0	0	0	2	0	0	10	0	0	0	0	0	0	2	0	4	0	0	5	0	0	0	0	0	0	0	0	1	0	0	0	0	0	0	0	0	0	0	0	0	0
74	SS	0	0	0	0	0	2	8	0	11	4	0	7	1	10	0	8	0	0	1	0	0	0	4	0	0	0	0	0	0	0	0	0	6	0	0	0	0	0	0	0	0	0	0	0	0	0	0	0
75	SS	0	0	0	0	0	0	0	0	0	0	1	0	0	0	0	0	0	0	0	0	0	0	0	0	0	0	0	3	0	0	13	11	0	0	0	0	0	13	0	0	0	0	0	0	0	7	0	0
76	SS	0	0	0	2	6	12	12	12	7	6	0	0	2	4	11	5	13	8	11	13	6	6	0	11	13	13	13	11	12	13	12	7	13	0	0	0	10	9	0	2	0	1	0	2	11	13	10	13
77	SS	0	0	0	0	0	0	0	0	0	0	0	0	0	0	0	0	0	0	0	0	0	0	1	7	11	13	13	0	8	0	13	0	0	0	2	0	0	13	3	0	8	13	2	13	0	0	4	10
78	SS	0	0	0	0	0	0	0	0	0	0	0	0	0	0	0	0	0	5	0	8	10	0	3	6	12	2	0	12	3	0	13	0	0	0	7	1	13	0	0	0	2	0	0	13	0	0	10	7
79	SS	0	0	0	0	0	0	0	0	0	0	0	0	0	0	0	0	11	0	0	0	8	3	0	0	0	0	0	0	0	0	0	0	0	0	0	0	0	0	0	0	0	0	0	0	0	0	0	0
80	SS	0	0	0	0	0	0	0	0	0	0	0	0	0	0	0	0	0	13	7	6	11	5	13	10	12	10	11	0	0	11	9	4	10	0	0	4	0	0	0	0	11	0	1	11	0	0	0	0
81	SS	0	0	0	0	0	0	0	0	0	0	0	0	0	0	0	0	0	0	0	0	0	0	0	0	0	0	0	0	0	0	1	0	0	0	0	2	0	0	0	0	0	0	0	2	10	0	0	0
82	SS	0	0	0	0	0	0	0	0	0	0	0	0	0	0	0	0	0	0	0	0	0	0	0	0	0	0	0	9	9	13	0	0	0	0	0	0	1	0	0	0	0	0	0	0	0	0	10	0
83	SS	0	0	0	0	0	0	0	0	0	0	0	0	0	0	0	0	0	0	0	0	0	0	0	0	0	0	0	0	0	0	0	0	0	0	0	0	1	0	0	0	0	0	0	0	0	0	0	0
84	SS	0	0	0	0	0	0	0	0	0	0	0	0	0	0	0	0	0	0	0	0	0	0	0	0	0	0	0	0	0	0	0	0	0	0	0	0	0	0	11	0	0	2	0	0	0	0	6	2
85	SS	0	0	0	0	0	0	0	0	0	0	0	0	0	0	0	0	2	0	1	13	13	13	12	9	3	8	13	12	13	13	12	13	11	13	10	0	9	12	13	7	12	0	10	6	7	13	13	13
86	SS	0	0	0	0	0	0	0	0	0	0	9	0	0	10	0	0	0	13	0	0	0	0	6	3	2	12	0	0	0	10	9	0	11	2	0	12	0	0	0	0	13	9	10	0	13	0	12	0
87	SS	0	0	0	0	0	0	0	0	0	0	0	0	0	0	0	0	0	0	0	0	0	0	0	0	0	0	0	0	0	0	0	0	0	0	0	0	4	0	0	0	0	0	0	0	0	0	0	0
88	SS	0	0	0	0	0	0	0	0	0	0	0	0	0	0	0	0	0	10	11	11	13	13	11	1	12	1	0	6	11	13	13	12	0	0	0	0	0	0	0	0	4	5	11	13	12	8	8	5
89	SS	0	0	0	0	4	6	6	9	7	0	13	2	11	4	3	7	8	3	6	12	4	10	0	0	0	11	2	0	0	0	3	6	0	6	0	13	0	0	0	1	1	13	13	0	0	0	0	0
90	SS	0	0	0	0	0	0	0	0	0	0	0	0	2	0	0	0	0	0	0	0	0	0	0	2	3	0	0	0	0	0	0	0	0	0	1	0	0	0	0	8	0	0	0	0	2	0	0	0
91	SS	0	0	0	0	0	0	0	0	0	0	0	0	0	0	0	0	0	0	0	0	12	11	0	0	0	11	13	6	0	0	0	9	11	13	0	0	0	0	9	0	2	0	0	0	0	0	3	0
92	SS	0	0	0	0	0	0	4	0	0	0	0	0	0	0	0	0	0	0	0	13	13	13	13	0	3	5	3	11	4	0	0	0	0	0	0	0	0	1	5	0	2	0	0	0	0	6	0	0
93	SS	0	0	0	0	0	2	0	10	11	1	12	0	0	12	0	13	0	0	0	11	2	13	0	0	0	0	0	0	0	0	0	0	0	0	0	0	0	0	0	0	0	0	0	0	0	0	0	0
94	SS	0	0	0	0	0	0	6	13	0	0	0	0	0	0	0	0	11	5	12	13	13	10	11	0	4	5	5	0	0	4	0	0	0	0	0	5	0	0	0	0	0	5	0	0	0	2	7	0
95	SS	0	0	0	0	0	0	0	0	0	0	0	0	0	0	0	0	0	0	0	0	4	0	10	13	12	13	12	0	0	0	0	0	0	0	0	0	0	0	4	1	0	0	0	0	2	9	0	9
96	SS	0	0	0	0	0	0	0	0	0	0	0	0	0	0	0	0	0	0	0	0	0	0	0	0	0	0	0	0	0	0	0	0	0	0	0	2	0	0	0	0	0	0	0	0	0	0	0	0
97	SS	0	0	0	0	0	0	0	0	0	0	0	0	0	0	0	0	0	0	0	0	0	0	0	0	0	0	0	0	0	0	0	0	0	0	1	0	0	0	0	0	0	0	6	6	0	0	0	0
98	SS	0	0	0	0	0	0	0	0	0	0	0	0	4	12	0	9	9	1	13	0	2	7	0	9	3	9	8	0	10	1	7	3	1	13	11	1	0	6	6	12	12	11	0	3	0	6	12	10
99	SS	0	0	0	0	0	0	0	0	0	0	0	0	0	0	0	0	13	0	0	1	0	1	1	3	3	10	11	8	2	12	0	1	13	0	10	0	8	13	12	8	9	0	0	0	0	13	13	5
100	SS	0	0	0	0	0	0	0	0	0	1	13	0	8	0	3	0	3	0	0	11	0	0	0	0	2	6	9	13	12	0	0	0	13	0	13	13	0	10	7	0	0	12	0	0	0	0	0	13
101	SS	0	0	0	0	0	0	1	0	0	13	0	0	0	0	0	0	0	11	12	1	0	10	0	0	0	0	0	7	0	0	0	0	2	0	13	12	0	0	9	0	7	0	0	0	0	1	0	0
102	SS	0	0	0	0	0	0	0	0	0	0	0	0	0	0	1	0	0	0	0	0	0	0	0	0	2	0	0	0	0	0	0	0	0	0	0	0	0	0	1	0	0	0	1	4	0	6	0	1
103	SS	0	0	0	0	0	0	0	0	0	0	0	0	0	0	2	9	11	10	0	0	0	0	0	0	0	0	0	0	0	13	13	13	13	12	8	0	0	0	0	0	0	0	0	0	0	0	0	0
104	SS	0	0	0	0	0	0	0	0	0	0	0	0	0	0	0	0	0	0	0	0	0	0	0	0	0	0	7	0	10	0	0	11	7	0	0	1	0	7	0	0	0	0	0	0	0	0	11	13
105	SS	0	0	0	0	0	0	0	0	0	0	0	0	0	0	0	0	0	0	0	0	13	0	0	0	6	0	13	0	0	0	0	0	0	1	0	0	0	0	0	0	0	0	13	13	13	0	0	0
106	SS	0	0	0	0	0	0	1	0	1	5	0	0	0	0	0	0	0	0	0	0	0	3	5	10	0	0	0	0	0	0	0	0	0	0	0	1	1	3	4	7	8	8	0	11	13	0	13	0
107	SS	0	0	0	0	0	0	0	0	0	0	0	0	0	0	0	13	0	0	5	3	0	0	2	3	3	13	13	0	0	0	0	13	13	13	13	13	13	0	0	11	0	0	0	13	12	12	8	13
108	SS	0	0	0	0	0	0	0	0	0	0	0	0	0	0	0	0	0	0	0	0	0	0	0	0	0	0	0	0	0	0	0	0	0	0	0	0	0	0	0	0	0	0	0	0	0	0	0	1
109	SS	0	0	0	0	0	0	0	0	0	0	0	0	0	0	13	13	0	0	0	0	1	4	0	0	0	0	0	0	0	0	0	0	0	0	0	0	0	7	0	0	0	1	0	0	0	0	0	0
110	SS	0	0	0	0	0	0	0	0	0	0	3	0	0	0	8	0	0	9	8	4	8	7	8	13	7	9	9	12	10	12	10	13	0	0	2	6	6	13	13	1	10	1	9	6	5	0	13	0
111	SS	0	0	0	0	0	11	0	13	0	0	13	13	2	7	0	8	0	13	13	13	5	0	1	4	12	13	13	8	13	0	13	13	0	0	13	0	0	0	13	0	11	0	0	0	0	0	6	11
112	SS	0	0	0	0	0	0	0	2	9	9	4	0	11	13	3	0	0	0	12	13	7	0	0	0	0	0	0	0	13	13	13	2	9	0	12	10	4	4	4	6	0	2	10	13	10	0	8	12
113	SS	0	0	0	0	0	0	0	0	0	0	0	4	1	0	0	0	0	4	7	0	0	0	0	0	0	0	0	0	0	10	0	0	0	0	0	0	0	0	0	0	0	4	1	4	0	0	0	0
114	SS	0	0	0	0	0	0	0	0	0	0	0	0	0	0	0	0	0	0	0	0	0	0	0	0	0	0	0	13	0	0	0	0	0	0	0	0	0	0	0	0	0	0	0	0	0	0	8	0
115	SS	0	0	0	0	10	6	9	12	11	12	13	11	9	11	10	13	12	12	8	13	12	12	5	6	9	12	13	12	12	5	11	12	9	9	5	8	11	8	8	8	5	0	8	12	10	13	13	7
116	SS	0	0	0	0	0	0	0	2	1	0	0	7	0	0	7	2	12	0	12	0	9	2	9	2	0	0	0	13	0	5	13	0	11	0	0	10	2	0	0	0	0	0	0	0	0	0	3	0
117	SS	0	0	0	0	0	0	0	0	0	0	0	0	5	0	0	7	0	0	8	0	5	0	13	4	0	1	0	0	5	13	0	0	0	0	0	13	13	0	0	0	2	9	0	0	0	0	0	0
118	SS	0	0	0	0	0	0	0	0	0	0	0	0	0	0	0	0	0	0	0	0	0	4	13	0	0	0	0	0	0	0	0	0	0	0	0	0	0	6	0	0	0	0	0	0	0	0	0	0
119	SS	0	0	0	0	0	0	0	3	0	1	0	4	10	9	9	0	6	13	13	13	13	12	13	13	13	13	13	13	13	0	13	13	0	13	13	13	11	13	13	13	9	12	0	0	0	0	0	0
120	SS	0	0	0	0	0	0	0	0	0	0	0	0	0	0	0	0	0	0	0	0	0	2	0	0	0	0	0	0	0	0	0	0	0	0	0	0	0	0	0	0	0	0	0	0	0	0	0	0
121	SS	0	0	0	0	0	9	2	4	2	9	10	13	13	13	12	12	1	6	10	6	0	0	11	10	1	13	9	0	2	0	10	0	0	11	0	0	0	8	8	8	0	0	11	0	0	2	13	1
122	SS	0	0	0	0	0	0	0	0	0	0	0	0	0	0	0	0	0	0	0	0	0	0	2	1	1	1	1	0	2	0	0	0	0	0	0	0	0	0	0	8	3	0	0	0	0	0	0	0
123	SS	0	0	0	0	10	7	9	5	11	13	12	9	13	13	7	13	10	4	12	0	11	9	0	8	0	0	4	1	0	0	0	0	4	0	0	0	0	12	10	0	0	0	0	0	0	0	0	0
124	SS	0	0	0	0	0	0	0	0	0	11	13	8	6	0	0	0	0	6	0	0	5	0	0	7	11	13	0	12	0	0	0	0	0	0	0	0	0	0	0	0	0	0	11	0	13	0	0	6
125	SS	0	0	0	0	0	0	0	1	0	0	0	0	13	0	0	4	0	0	0	12	0	0	7	13	13	13	11	12	0	0	0	0	0	6	0	0	13	0	0	12	13	5	13	0	1	11	0	0
126	SS	0	0	0	0	0	0	0	0	0	0	0	1	1	0	0	0	13	11	4	12	9	7	10	0	3	13	0	10	12	9	13	13	8	0	0	0	0	0	0	0	0	0	0	0	3	0	10	0
127	SS	0	0	0	0	0	0	0	0	0	0	0	0	0	0	0	0	0	0	0	0	0	0	0	0	0	0	0	0	0	0	0	0	0	0	0	0	0	0	0	0	0	0	0	0	0	0	0	0
128	SS	0	0	0	0	0	0	0	2	0	0	0	0	0	0	0	0	0	9	0	2	3	0	0	0	0	5	0	0	0	0	3	5	12	2	0	0	0	0	0	0	0	0	0	0	0	0	0	0
129	SS	0	0	0	0	0	0	0	0	1	0	0	0	0	0	7	0	13	6	0	0	0	10	3	0	0	2	0	11	0	0	5	0	0	0	13	0	0	0	0	0	13	13	2	0	13	13	13	12
130	SS	0	0	0	0	0	0	0	2	0	0	0	0	0	0	0	0	6	1	13	9	0	12	12	12	0	0	0	5	0	0	0	4	12	0	0	0	13	0	0	0	0	0	0	7	0	1	0	0
131	SS	0	0	0	0	0	0	0	0	0	0	0	0	0	0	0	1	4	0	4	4	4	4	2	0	3	3	5	0	0	0	0	0	0	0	0	0	0	0	2	8	0	1	0	7	3	0	0	2
132	SS	0	0	0	0	0	0	0	0	0	0	0	0	0	0	0	0	0	0	0	0	0	3	1	0	6	4	4	0	1	0	3	0	0	0	0	0	0	0	1	0	0	0	0	4	0	0	6	0
133	SS	0	0	0	0	0	0	0	0	0	0	0	0	0	0	0	0	1	0	0	0	0	0	0	0	0	0	0	0	3	0	0	0	0	1	3	0	0	0	0	0	0	0	0	0	0	0	10	0
134	SS	0	0	0	0	0	0	0	0	0	0	0	0	0	0	0	0	0	0	0	0	0	0	0	0	12	3	0	8	0	0	0	0	0	0	0	1	3	0	0	0	0	0	0	0	0	0	0	0
135	SS	0	0	0	0	0	0	0	0	0	0	0	6	13	9	3	10	13	9	13	13	3	1	2	4	0	9	0	8	6	6	7	12	13	5	0	12	0	10	10	8	0	0	3	0	2	0	11	11
136	SS	0	0	0	0	0	0	0	0	0	0	0	0	0	0	0	0	0	0	0	0	0	6	0	0	0	0	0	0	0	0	0	0	0	0	8	7	0	0	0	0	0	0	0	3	4	0	0	0
137	SS	0	0	0	0	0	0	0	0	0	0	4	0	2	0	0	0	0	4	2	0	2	5	6	0	7	6	3	5	0	0	0	2	0	0	0	0	0	0	0	0	0	0	0	0	0	0	0	0
138	SS	0	0	0	0	0	0	0	0	0	0	0	0	0	0	0	0	0	2	4	0	0	2	1	0	0	0	0	0	0	0	0	0	1	0	0	0	0	0	0	0	0	0	0	0	0	0	9	0
139	SS	0	0	0	0	0	0	0	0	0	0	0	0	0	13	4	0	0	0	0	0	0	1	0	0	0	0	0	0	1	0	13	0	0	0	0	12	13	13	0	0	1	0	0	0	0	0	0	0
140	SS	0	0	0	0	0	0	0	0	0	0	0	0	0	0	0	1	0	0	0	0	0	0	0	0	0	0	0	0	0	0	0	7	0	0	0	0	5	0	0	0	0	0	0	0	0	0	0	0
141	SS	0	0	0	0	0	0	0	0	0	0	0	0	0	0	0	0	0	2	0	0	0	0	0	0	8	4	2	3	0	13	5	0	2	2	10	0	0	13	0	13	0	0	0	9	3	0	0	0
142	SS	0	0	0	0	0	0	0	0	0	0	0	0	0	0	0	0	0	0	0	0	0	0	0	0	0	0	0	4	4	3	6	10	0	0	4	8	0	0	3	3	4	3	4	13	7	7	8	0
143	SS	0	0	0	0	0	0	0	0	0	0	0	0	0	0	0	0	0	0	0	0	0	0	0	0	0	0	0	0	0	0	0	0	0	0	0	0	0	0	0	0	0	0	0	0	0	0	0	0
144	SS	0	0	0	0	0	0	0	0	0	0	0	0	0	0	0	0	8	2	0	0	0	0	0	0	0	0	0	0	4	1	0	2	0	2	0	2	0	0	0	4	0	0	3	2	5	0	11	8
145	SS	0	0	0	0	0	0	0	0	0	0	13	13	4	3	5	0	0	0	8	0	2	4	0	13	6	3	1	0	10	12	0	0	0	9	0	9	9	4	13	6	0	0	0	0	0	0	12	6
146	SS	0	0	0	0	0	0	0	0	0	0	0	0	0	0	0	13	10	11	12	10	0	3	3	12	0	4	5	0	0	0	6	11	0	3	0	12	0	13	0	0	0	0	6	0	0	12	7	0
147	SS	0	0	0	0	0	0	0	0	0	0	0	0	0	0	0	0	0	0	0	0	0	0	0	0	0	0	0	0	0	0	4	13	6	10	0	13	13	5	0	0	0	0	2	1	0	0	1	13
1	SP	0	0	0	0	0	0	0	0	0	0	0	0	0	0	0
2	SP	0	0	0	0	0	0	0	0	0	9	0	0	0	0	0
3	SP	0	0	0	0	0	0	0	0	0	0	0	0	0	0	0
4	SP	0	0	0	0	0	0	0	2	7	10	0	1	7	7	12	0
5	SP	0	0	0	0	0	0	0	1	6	13	0	0	13	0	0	0
6	SP	0	0	0	0	0	0	0	0	0	7	0	0	0	0	0	0	0
7	SP	0	0	0	0	0	0	0	0	0	0	0	0	3	0	0	7	5	0	0
8	SP	0	0	0	0	0	0	0	0	0	0	0	0	0	0	0	0	0	0	0	4
9	SP	0	0	0	0	0	0	0	0	0	0	0	0	0	0	0	0	1	0	0	7	0	1	4	0	10	5
10	SP	0	0	0	0	0	0	0	0	0	0	0	0	0	0	0	0	2	1	9	0	0	4	1	1	0	0	0	4	0	0
11	SP	0	0	0	0	0	0	0	0	0	0	0	0	13	0	9	13	13	6	13	13	12	13	13	8	5	8	9	3	13	13	9	13	12	0	0
12	SP	0	0	0	0	0	0	0	0	0	0	0	2	0	0	0	8	7	13	5	12	12	13	13	13	10	13	9	12	11	12	9	13	12	7	5	3	0
13	SP	0	0	0	0	0	0	0	0	0	0	0	0	0	0	0	0	4	0	0	0	0	3	3	7	9	1	3	0	0	0	0	0	10	8	13	0	0	0
14	SP	0	0	0	0	0	0	0	0	0	0	0	0	0	0	0	0	0	0	0	0	0	0	0	0	3	4	8	11	13	12	13	12	11	13	11	13	12	12	10
15	SP	0	0	0	0	0	0	0	0	0	0	0	0	0	0	0	0	0	0	0	2	0	3	2	0	2	5	3	1	0	5	0	0	0	0	0	0	0	0	0	0	0
16	SP	0	0	0	0	0	0	0	0	0	0	0	0	0	0	0	7	9	13	11	13	13	13	13	13	3	7	8	13	13	8	9	13	11	13	13	0	3	0	1	0	0	0	0
17	SP	0	0	0	0	0	0	0	0	0	0	0	0	0	0	0	0	0	0	0	0	6	6	8	9	9	13	13	13	13	13	0	0	13	13	11	7	13	13	12	6	2	0	6
18	SP	0	0	0	0	0	0	0	0	0	0	1	0	0	0	0	0	0	0	0	1	0	2	1	0	3	6	9	11	6	11	0	8	0	0	0	0	13	6	1	0	2	0	0	0	0	0	0	0
19	SP	0	0	0	0	0	0	5	0	0	0	0	0	0	1	0	0	4	8	13	12	12	13	11	7	8	9	6	12	5	4	0	0	0	6	10	13	8	13	9	11	5	9	9	11	11	12	13	11
20	SP	0	0	0	0	0	0	0	0	0	0	0	0	0	0	0	6	0	0	0	13	12	13	2	0	0	0	1	13	0	1	3	8	1	7	0	0	4	0	0	10	2	7	9	0	0	10	4	6
21	SP	0	0	0	0	0	0	0	0	0	0	0	0	0	0	0	0	0	13	0	0	5	5	8	6	7	9	10	5	7	12	0	13	11	12	12	13	13	13	13	13	11	12	13	13	13	9	6	13
22	SP	0	0	0	0	0	0	0	0	0	0	0	0	0	0	0	0	8	7	13	6	13	9	13	13	3	4	4	13	13	13	12	13	12	4	13	8	10	13	13	11	11	13	6	0	6	11	12	13
23	SP	0	0	0	0	0	0	0	0	0	0	0	2	3	0	0	13	13	12	13	13	13	13	13	6	6	8	8	10	13	13	13	11	13	13	13	13	13	10	13	13	12	13	13	13	13	12	13	13
24	SP	0	0	0	0	0	0	0	0	0	0	0	0	0	0	0	0	0	0	6	9	12	13	13	13	6	9	4	13	13	12	7	0	8	4	0	5	0	9	3	6	4	3	7	0	6	13	13	1
25	SP	0	0	0	0	0	0	0	0	0	0	0	0	0	0	0	0	0	0	8	11	13	13	13	10	9	4	9	13	13	13	13	13	12	13	13	13	13	13	13	0	0	0	0	8	13	12	10	11
26	SP	0	0	0	0	0	0	0	1	0	0	0	0	0	0	0	0	1	0	1	0	0	0	5	12	5	7	5	8	7	13	6	12	12	13	13	13	10	8	13	8	11	13	6	9	6	13	13	13
27	SP	0	0	0	0	0	0	0	1	0	0	0	0	0	0	0	0	10	13	13	13	13	13	10	13	8	13	13	13	13	13	13	5	13	12	13	0	13	9	3	9	12	12	13	0	8	0	0	9
28	SP	0	0	0	0	0	0	0	0	0	0	0	0	0	0	0	0	0	0	0	0	0	2	4	0	3	4	2	2	11	11	0	0	4	0	0	0	0	0	0	2	0	0	3	0	2	0	10	0
29	SP	0	0	0	0	0	0	0	0	0	0	0	0	0	0	0	0	12	0	13	0	7	5	12	13	13	12	13	11	13	13	12	11	13	10	13	13	13	13	12	12	11	13	13	12	13	12	12	10
30	SP	0	0	0	0	0	0	0	0	0	0	0	0	0	0	0	0	0	1	0	4	13	13	11	12	7	11	11	13	10	12	9	8	11	13	13	13	10	13	12	13	13	11	13	13	12	11	13	13
31	SP	0	0	0	0	0	0	0	0	0	0	0	0	0	0	0	0	0	1	13	13	13	9	4	0	0	0	5	11	13	13	13	12	11	12	12	13	13	13	8	12	12	12	13	12	10	11	9	13
32	SP	0	0	0	0	0	0	0	0	0	0	0	0	13	8	3	9	7	13	13	13	13	13	9	5	3	5	8	6	13	13	13	1	11	13	13	0	0	4	10	13	13	13	13	13	13	13	12	13
33	SP	0	0	0	0	0	0	0	0	0	0	0	0	0	0	0	0	10	11	7	8	10	9	13	9	10	12	12	13	13	12	12	12	13	9	13	13	13	13	13	13	12	13	13	13	10	12	13	13
34	SP	0	0	0	0	0	0	0	0	0	0	0	0	0	0	0	0	0	0	8	2	0	0	0	10	9	10	8	13	0	9	8	4	12	4	10	2	10	12	12	9	0	13	13	13	10	10	13	13
35	SP	0	0	0	0	0	0	0	0	0	0	0	0	0	0	0	0	0	1	0	0	0	3	4	2	4	7	10	6	0	0	0	0	0	0	2	0	0	1	8	0	0	0	9	9	10	11	13	13
36	SP	0	0	0	0	0	0	0	0	0	3	0	9	9	2	0	0	0	12	13	0	9	13	13	6	9	9	9	12	13	12	13	13	13	13	11	12	13	9	12	13	13	13	13	13	12	12	9	13
37	SP	0	0	0	0	0	0	0	0	0	0	0	0	0	0	0	0	1	0	0	0	0	3	2	0	9	10	4	11	1	4	11	5	1	0	13	7	0	0	12	7	11	11	11	11	12	10	8	8
38	SP	0	0	0	0	0	0	0	0	0	0	0	0	0	0	0	9	13	12	13	13	0	4	7	2	1	5	7	13	0	13	0	0	8	10	3	2	6	8	12	9	13	13	13	9	12	13	13	9
39	SP	0	0	0	0	0	0	0	0	0	0	0	0	0	0	0	0	0	0	1	0	0	4	2	0	6	8	6	8	6	8	12	1	10	5	11	2	5	4	2	11	4	12	10	13	7	4	9	9
40	SP	0	0	0	0	0	0	0	0	0	0	0	0	0	0	0	0	4	11	11	12	13	13	7	12	5	5	5	2	9	13	11	13	0	5	12	13	13	13	3	8	7	0	5	8	3	3	12	10
41	SP	0	0	0	0	0	0	0	0	0	0	0	0	5	0	0	0	2	7	13	0	10	9	13	11	8	12	11	12	13	13	0	0	8	11	6	10	13	13	10	11	13	13	13	13	12	13	11	13
42	SP	0	0	0	0	0	0	0	0	0	0	0	0	0	0	0	0	0	8	13	13	13	13	13	13	10	10	11	13	12	2	6	13	12	8	0	0	0	12	12	11	0	1	9	11	10	12	13	3
43	SP	0	0	0	0	0	0	0	0	0	0	0	0	0	0	0	0	0	0	1	0	9	11	7	4	8	11	9	1	0	2	3	0	0	0	0	2	11	13	3	6	2	0	7	13	10	13	10	8
44	SP	0	0	0	0	0	0	0	0	0	0	0	0	0	0	3	13	11	11	4	11	13	13	5	13	7	11	11	10	13	13	10	13	12	13	13	13	13	13	13	13	13	13	13	13	12	12	12	13
45	SP	0	0	0	0	0	0	0	0	0	0	0	0	0	0	0	0	5	2	0	1	5	9	8	5	7	8	7	13	4	5	2	1	13	13	13	13	13	13	13	13	13	13	13	8	13	10	12	10
46	SP	0	0	0	0	0	0	0	0	0	0	0	0	11	0	0	0	1	2	0	8	13	12	13	13	8	11	12	11	13	13	13	13	10	13	13	10	13	13	13	13	13	10	13	13	12	13	10	13
47	SP	0	0	0	0	0	0	0	0	0	0	0	0	0	0	4	0	10	2	6	7	9	10	13	13	10	9	9	5	13	4	13	13	13	12	13	12	9	13	13	13	13	0	13	13	9	13	4	13
[truncated: 182 more columns]
